# Supplementary material
Source: Research Square preprint supplement (doi:10.21203/rs.3.rs-9589835/v1)
Supplement: Supplementary file 1 [file e5253fe1d01c22919407eb6e.docx]

Table S1: Sampling dates and associated weather.

| *Date* | *Temperature (deg C)* | *Relative humidity (%)* | *Wind speed (m/s)* |
| --- | --- | --- | --- |
| 11/04/2024 | 15 | 74.9 | 23 |
| 11/05/2024 | 25.7 | 46.9 | 0.7 |
| 13/06/2024 | 15.7-16.7 | 62.5-70.9 | 0.6-2.6 |
| 12/08/2024 | 29.3-29.8 | 50.4-55.9 | 0.4-1.3 |
| 09/09/2024 | 19.5 | 50.8 | 1.1 |
| 03/04/2025 | 19.5 | 46.4 | 1.1 |
| 29/04/2025 | 26-27 | 32-38 | 0-0.8 |
| 02/06/2025 | 20.3 | 44 | 0.6 |
| 29/06/2025 | 26.4 | 53.3 | 0.5 |
| 12/07/2025 | 30-32.7 | 33.6-40 | 0.5-1.7 |
| 28/07/2025 | 23.9 | 47 | 1 |
| 25/08/2025 | 28 | 42.3 | 1.5 |
| 29/09/2025 | 15.5 | 62.8 | 2.3 |

Table S2: t-tests comparing FMC of each fuel in ghost and control plots per sample date.

| Fuel | group1 | group2 | statistic | df | P value |
| --- | --- | --- | --- | --- | --- |
| **11/04/2024** | | | | | |
| Heather canopy | Control | Ghost | -1.14723 | 7.604443 | 0.286 |
| Organic layer | Control | Ghost | 1.261927 | 7.897262 | 0.243 |
| Heather stem | Control | Ghost | 1.488499 | 11.89421 | 0.163 |
| **11/05/2024** | | | | | |
| Heather canopy | Control | Ghost | 0.067728 | 9.930971 | 0.947 |
| Organic layer | Control | Ghost | -1.28647 | 9.780111 | 0.228 |
| Heather stem | Control | Ghost | 0.373441 | 8.875583 | 0.718 |
| **13/06/2024** | | | | | |
| Heather canopy | Control | Ghost | -0.40334 | 10.76236 | 0.695 |
| Organic layer | Control | Ghost | -0.78314 | 11.70102 | 0.449 |
| Heather stem | Control | Ghost | -0.95586 | 11.3454 | 0.359 |
| **12/08/2024** | | | | | |
| Heather canopy | Control | Ghost | 2.113725 | 11.25419 | 0.0576 |
| Organic layer | Control | Ghost | 0.270536 | 11.29267 | 0.792 |
| Heather stem | Control | Ghost | 0.109407 | 9.491847 | 0.915 |
| **09/09/2024** | | | | | |
| Heather canopy | Control | Ghost | 1.610538 | 8.078949 | 0.146 |
| Organic layer | Control | Ghost | -1.07704 | 10.62116 | 0.305 |
| Heather stem | Control | Ghost | 0.201433 | 11.99348 | 0.844 |
| **03/04/2025** | | | | | |
| Heather canopy | Control | Ghost | 1.169605 | 11.0851 | 0.267 |
| Organic layer | Control | Ghost | -0.4002 | 10.93544 | 0.697 |
| Heather stem | Control | Ghost | -0.98445 | 7.139098 | 0.357 |
| **29/04/2025** | | | | | |
| Heather canopy | Control | Ghost | -0.43167 | 7.953768 | 0.677 |
| Organic layer | Control | Ghost | -1.02232 | 8.167492 | 0.336 |
| Heather stem | Control | Ghost | -0.56248 | 10.79787 | 0.585 |
| **02/06/2025** | | | | | |
| Heather canopy | Control | Ghost | 0.173987 | 11.80024 | 0.865 |
| Organic layer | Control | Ghost | 0.510622 | 8.306345 | 0.623 |
| Heather stem | Control | Ghost | 0.080797 | 11.93318 | 0.937 |
| **29/06/2025** | | | | | |
| Heather canopy | Control | Ghost | -0.2375 | 11.75458 | 0.816 |
| Organic layer | Control | Ghost | -0.20983 | 11.54494 | 0.837 |
| Heather stem | Control | Ghost | -0.66836 | 11.43375 | 0.517 |
| **12/07/2025** | | | | | |
| Heather canopy | Control | Ghost | -0.04247 | 11.99657 | 0.967 |
| Organic layer | Control | Ghost | 0.284965 | 10.89267 | 0.781 |
| Heather stem | Control | Ghost | 0.014973 | 11.44493 | 0.988 |
| **28/07/2025** | | | | | |
| Heather canopy | Control | Ghost | 0.692335 | 11.97503 | 0.502 |
| Organic layer | Control | Ghost | -0.44112 | 10.31004 | 0.668 |
| Heather stem | Control | Ghost | 1.526693 | 10.77392 | 0.156 |
| **25/08/2025** | | | | | |
| Heather canopy | Control | Ghost | 0.714979 | 10.24257 | 0.491 |
| Organic layer | Control | Ghost | -0.16733 | 10.54236 | 0.87 |
| Heather stem | Control | Ghost | 0.601847 | 11.26142 | 0.559 |
| **29/09/2025** | | | | | |
| Heather canopy | Control | Ghost | 2.194845 | 11.8563 | **0.0488** |
| Organic layer | Control | Ghost | -0.96723 | 10.50469 | 0.355 |
| Heather stem | Control | Ghost | 1.229955 | 9.706396 | 0.248 |

Table S3: t-tests comparing the Peak Heat Release Rate (PHRR) of each fuel in ghost and control plots per sample date.

| Fuel | group1 | group2 | statistic | df | P value |
| --- | --- | --- | --- | --- | --- |
| **11/04/2024** | | | | | |
| Heather canopy | Control | Ghost | 0.382641 | 10.58314 | 0.71 |
| Heather stem | Control | Ghost | -0.7021 | 9.782212 | 0.499 |
| **13/06/2024** | | | | | |
| Heather canopy | Control | Ghost | -0.49254 | 8.147655 | 0.635 |
| Heather stem | Control | Ghost | 0.080144 | 10.71288 | 0.938 |
| **12/08/2024** | | | | | |
| Heather canopy | Control | Ghost | -2.6337 | 10.42537 | **0.0242** |
| Heather stem | Control | Ghost | -2.38847 | 11.83572 | **0.0345** |
| **09/09/2024** | | | | | |
| Heather canopy | Control | Ghost | 0.992086 | 11.55546 | 0.341 |
| Heather stem | Control | Ghost | -0.98971 | 10.0278 | 0.346 |
| **29/04/2025** | | | | | |
| Heather canopy | Control | Ghost | -0.18494 | 10.00052 | 0.857 |
| Heather stem | Control | Ghost | 0.247795 | 8.480383 | 0.81 |
| **02/06/2025** | | | | | |
| Heather canopy | Control | Ghost | -1.2772 | 10.77988 | 0.228 |
| Heather stem | Control | Ghost | -0.62944 | 10.51284 | 0.542 |
| **29/06/2025** | | | | | |
| Heather canopy | Control | Ghost | 0.089529 | 10.39286 | 0.93 |
| Heather stem | Control | Ghost | 0.408615 | 11.14378 | 0.691 |
| **12/07/2025** | | | | | |
| Heather canopy | Control | Ghost | -1.7234 | 8.878649 | 0.119 |
| Heather stem | Control | Ghost | -0.95308 | 10.89539 | 0.361 |
| **28/07/2025** | | | | | |
| Heather canopy | Control | Ghost | -0.83328 | 11.5146 | 0.422 |
| Heather stem | Control | Ghost | -0.93623 | 10.87294 | 0.369 |
| **25/08/2025** | | | | | |
| Heather canopy | Control | Ghost | 0.061106 | 11.3861 | 0.952 |
| Heather stem | Control | Ghost | -0.99966 | 11.64719 | 0.338 |
| **29/09/2025** | | | | | |
| Heather canopy | Control | Ghost | -1.23702 | 9.561668 | 0.246 |
| Heather stem | Control | Ghost | -0.29733 | 10.69874 | 0.772 |

Table S4: t-tests comparing the Total Heat Release (THR) of each fuel in ghost and control plots per sample date.

| Fuel | group1 | group2 | statistic | df | P value |
| --- | --- | --- | --- | --- | --- |
| **11/04/2024** | | | | | |
| Heather canopy | Control | Ghost | 0.648275 | 10.0132 | 0.531 |
| Heather stem | Control | Ghost | -0.46325 | 11.93891 | 0.652 |
| **13/06/2024** | | | | | |
| Heather canopy | Control | Ghost | -0.41725 | 11.19528 | 0.684 |
| Heather stem | Control | Ghost | 0.724849 | 11.95924 | 0.482 |
| **12/08/2024** | | | | | |
| Heather canopy | Control | Ghost | -1.22614 | 9.15998 | 0.251 |
| Heather stem | Control | Ghost | -1.93526 | 9.501931 | 0.0832 |
| **09/09/2024** | | | | | |
| Heather canopy | Control | Ghost | 0.652654 | 10.84996 | 0.528 |
| Heather stem | Control | Ghost | -1.20493 | 11.58137 | 0.252 |
| **29/04/2025** | | | | | |
| Heather canopy | Control | Ghost | -0.12198 | 10.23872 | 0.905 |
| Heather stem | Control | Ghost | -0.62266 | 8.271017 | 0.55 |
| **02/06/2025** | | | | | |
| Heather canopy | Control | Ghost | -1.93644 | 11.68929 | 0.0774 |
| Heather stem | Control | Ghost | 0.293972 | 8.849165 | 0.776 |
| **29/06/2025** | | | | | |
| Heather canopy | Control | Ghost | 0.311921 | 10.29199 | 0.761 |
| Heather stem | Control | Ghost | 0.341794 | 10.40714 | 0.739 |
| **12/07/2025** | | | | | |
| Heather canopy | Control | Ghost | -2.16996 | 8.667082 | 0.0593 |
| Heather stem | Control | Ghost | -2.35172 | 10.92074 | **0.0385** |
| **28/07/2025** | | | | | |
| Heather canopy | Control | Ghost | -0.15975 | 9.913404 | 0.876 |
| Heather stem | Control | Ghost | -1.21681 | 6.589702 | 0.265 |
| **25/08/2025** | | | | | |
| Heather canopy | Control | Ghost | 0.581037 | 11.76578 | 0.572 |
| Heather stem | Control | Ghost | -0.37947 | 11.99947 | 0.711 |
| **29/09/2025** | | | | | |
| Heather canopy | Control | Ghost | -1.38583 | 7.486119 | 0.206 |
| Heather stem | Control | Ghost | -0.85983 | 11.03741 | 0.408 |

Table S5: t-tests comparing the maximum temperature of decomposition (Tmax) of each fuel in ghost and control plots per sample date.

| Fuel | group1 | group2 | statistic | df | P value |
| --- | --- | --- | --- | --- | --- |
| **11/04/2024** | | | | | |
| Heather canopy | Control | Ghost | 0.965688 | 11.97133 | 0.353 |
| Heather stem | Control | Ghost | -0.10464 | 11.77988 | 0.918 |
| **13/06/2024** | | | | | |
| Heather canopy | Control | Ghost | -1.38709 | 11.50202 | 0.192 |
| Heather stem | Control | Ghost | 0.202312 | 11.98332 | 0.843 |
| **12/08/2024** | | | | | |
| Heather canopy | Control | Ghost | 0.805066 | 11.97496 | 0.436 |
| Heather stem | Control | Ghost | -1.60053 | 9.539543 | 0.142 |
| **09/09/2024** | | | | | |
| Heather canopy | Control | Ghost | 1.125996 | 11.32181 | 0.283 |
| Heather stem | Control | Ghost | 0.500134 | 9.525541 | 0.628 |
| **29/04/2025** | | | | | |
| Heather canopy | Control | Ghost | -0.32252 | 8.053489 | 0.755 |
| Heather stem | Control | Ghost | 0.104523 | 11.37119 | 0.919 |
| **02/06/2025** | | | | | |
| Heather canopy | Control | Ghost | 0.198268 | 8.152418 | 0.848 |
| Heather stem | Control | Ghost | 0.081648 | 8.077423 | 0.937 |
| **29/06/2025** | | | | | |
| Heather canopy | Control | Ghost | -2.44811 | 10.47147 | **0.0334** |
| Heather stem | Control | Ghost | 1.450575 | 11.63399 | 0.173 |
| **12/07/2025** | | | | | |
| Heather canopy | Control | Ghost | 0.034145 | 8.136739 | 0.974 |
| Heather stem | Control | Ghost | -0.80721 | 10.72841 | 0.437 |
| **28/07/2025** | | | | | |
| Heather canopy | Control | Ghost | -0.55408 | 11.88272 | 0.59 |
| Heather stem | Control | Ghost | 1.426157 | 11.26684 | 0.181 |
| **25/08/2025** | | | | | |
| Heather canopy | Control | Ghost | -0.81389 | 8.976222 | 0.437 |
| Heather stem | Control | Ghost | -1.30363 | 9.467827 | 0.223 |
| **29/09/2025** | | | | | |
| Heather canopy | Control | Ghost | 0.441288 | 11.99364 | 0.667 |
| Heather stem | Control | Ghost | -0.07529 | 11.9102 | 0.941 |

Table S6: t-tests comparing FMC of each fuel in control (ghost + control) and drought plots per sample date. Significant p-values are shown in bold.

| Fuel | group1 | group2 | statistic | df | P value |
| --- | --- | --- | --- | --- | --- |
| **11/04/2024** | | | | | |
| Heather canopy | Control | Drought | -0.90961 | 18.95708 | 0.374 |
| Organic layer | Control | Drought | 1.324803 | 15.04422 | 0.205 |
| Heather stem | Control | Drought | 0.256866 | 9.613119 | 0.803 |
| **11/05/2024** | | | | | |
| Heather canopy | Control | Drought | 0.568638 | 10.56394 | 0.581 |
| Organic layer | Control | Drought | 1.658253 | 17.88783 | 0.115 |
| Heather stem | Control | Drought | 0.699294 | 8.445343 | 0.503 |
| **13/06/2024** | | | | | |
| Heather canopy | Control | Drought | 0.817068 | 14.85442 | 0.427 |
| Organic layer | Control | Drought | 2.850299 | 18.18198 | **0.0106** |
| Heather stem | Control | Drought | 1.5311 | 16.72109 | 0.144 |
| **12/08/2024** | | | | | |
| Heather canopy | Control | Drought | 1.265163 | 17.05442 | 0.223 |
| Organic layer | Control | Drought | 1.085173 | 15.62874 | 0.294 |
| Heather stem | Control | Drought | 0.999722 | 18.46751 | 0.33 |
| **09/09/2024** | | | | | |
| Heather canopy | Control | Drought | 2.039621 | 13.09079 | 0.0621 |
| Organic layer | Control | Drought | 2.033464 | 9.899168 | 0.0697 |
| Heather stem | Control | Drought | 1.451574 | 13.64701 | 0.169 |
| **03/04/2025** | | | | | |
| Heather canopy | Control | Drought | 1.296272 | 6.840341 | 0.237 |
| Organic layer | Control | Drought | 1.129567 | 14.08049 | 0.278 |
| Heather stem | Control | Drought | -0.68425 | 13.81287 | 0.505 |
| **29/04/2025** | | | | | |
| Heather canopy | Control | Drought | -0.3687 | 8.322 | 0.722 |
| Organic layer | Control | Drought | 2.493275 | 18.87046 | **0.0221** |
| Heather stem | Control | Drought | 1.034813 | 13.5905 | 0.319 |
| **02/06 2025** | | | | | |
| Heather canopy | Control | Drought | 1.859437 | 15.14381 | 0.0825 |
| Organic layer | Control | Drought | 3.254475 | 17.3143 | **0.00458** |
| Heather stem | Control | Drought | 2.60006 | 9.233655 | **0.0282** |
| **29/06/2025** | | | | | |
| Heather canopy | Control | Drought | -0.21223 | 9.684678 | 0.836 |
| Organic layer | Control | Drought | -0.23368 | 11.8758 | 0.819 |
| Heather stem | Control | Drought | 0.486535 | 12.31596 | 0.635 |
| **12/07/2025** | | | | | |
| Heather canopy | Control | Drought | -0.09041 | 18.97528 | 0.929 |
| Organic layer | Control | Drought | 1.177104 | 15.82343 | 0.257 |
| Heather stem | Control | Drought | 1.789422 | 12.64622 | 0.0975 |
| **28/07/2025** | | | | | |
| Heather canopy | Control | Drought | 0.099965 | 13.57632 | 0.922 |
| Organic layer | Control | Drought | 0.532314 | 12.48311 | 0.604 |
| Heather stem | Control | Drought | 0.931404 | 7.783012 | 0.38 |
| **25/08/2025** | | | | | |
| Heather canopy | Control | Drought | -0.37467 | 10.4162 | 0.715 |
| Organic layer | Control | Drought | 0.944134 | 15.19623 | 0.36 |
| Heather stem | Control | Drought | -1.03825 | 18.23878 | 0.313 |
| **29/09/2025** | | | | | |
| Heather canopy | Control | Drought | 0.973605 | 8.036121 | 0.359 |
| Organic layer | Control | Drought | 3.334223 | 17.1731 | **0.00389** |
| Heather stem | Control | Drought | 0.540991 | 18.56084 | 0.595 |

Table S7: t-tests comparing the Peak Heat Release Rate (PHRR) of each fuel in control (ghost + control) and drought plots per sample date. Significant p-values are shown in bold.

| Fuel | group1 | group2 | statistic | df | P value |
| --- | --- | --- | --- | --- | --- |
| **11/04/2024** | | | | | |
| Heather canopy | Control | Drought | -1.01724 | 11.54738 | 0.33 |
| Heather stem | Control | Drought | -0.03406 | 11.26456 | 0.973 |
| **13/06/2024** | | | | | |
| Heather canopy | Control | Drought | 0.021548 | 9.931419 | 0.983 |
| Heather stem | Control | Drought | 0.612623 | 8.668628 | 0.556 |
| **12/08/2024** | | | | | |
| Heather canopy | Control | Drought | 0.49214 | 7.328374 | 0.637 |
| Heather stem | Control | Drought | -1.2227 | 11.42931 | 0.246 |
| **09/09/2024** | | | | | |
| Heather canopy | Control | Drought | -2.1819 | 9.057901 | 0.0568 |
| Heather stem | Control | Drought | -0.16297 | 12.59698 | 0.873 |
| **29/04/2025** | | | | | |
| Heather canopy | Control | Drought | -1.03314 | 18.98983 | 0.315 |
| Heather stem | Control | Drought | 0.706069 | 11.833 | 0.494 |
| **02/06/2025** | | | | | |
| Heather canopy | Control | Drought | -1.77341 | 15.26718 | 0.0961 |
| Heather stem | Control | Drought | -1.37481 | 13.97783 | 0.191 |
| **29/06/2025** | | | | | |
| Heather canopy | Control | Drought | -0.63426 | 9.458906 | 0.541 |
| Heather stem | Control | Drought | 0.20345 | 7.663159 | 0.844 |
| **12/07/2025** | | | | | |
| Heather canopy | Control | Drought | 0.778683 | 17.65525 | 0.446 |
| Heather stem | Control | Drought | 1.134824 | 13.52051 | 0.276 |
| **28/07/2025** | | | | | |
| Heather canopy | Control | Drought | -0.1814 | 13.36363 | 0.859 |
| Heather stem | Control | Drought | -0.59477 | 18.30899 | 0.559 |
| **25/08/2025** | | | | | |
| Heather canopy | Control | Drought | -0.76796 | 8.195857 | 0.464 |
| Heather stem | Control | Drought | -1.07194 | 16.5778 | 0.299 |
| **29/09/2025** | | | | | |
| Heather canopy | Control | Drought | -0.31824 | 18.81171 | 0.754 |
| Heather stem | Control | Drought | -1.38978 | 14.62888 | 0.185 |

Table S8: t-tests comparing the Total Heat Release (THR) of each fuel in control (ghost + control) and drought plots per sample date. Significant p-values are shown in bold.

| Fuel | group1 | group2 | statistic | df | P value |
| --- | --- | --- | --- | --- | --- |
| **11/04/2024** | | | | | |
| Heather canopy | Control | Drought | -1.16184 | 12,29565 | 0.267 |
| Heather stem | Control | Drought | 0.461602 | 13.24459 | 0.652 |
| **13/06/2024** | | | | | |
| Heather canopy | Control | Drought | -0.26069 | 10.4044 | 0.799 |
| Heather stem | Control | Drought | 0.491633 | 9.359182 | 0.634 |
| **12/08/2024** | | | | | |
| Heather canopy | Control | Drought | -1.03336 | 9.881019 | 0.326 |
| Heather stem | Control | Drought | -2.59933 | 18.77671 | **0.0177** |
| **09/09/2024** | | | | | |
| Heather canopy | Control | Drought | -2.54476 | 8.459317 | **0.033** |
| Heather stem | Control | Drought | -1.12057 | 10.35469 | 0.288 |
| **29/04/2025** | | | | | |
| Heather canopy | Control | Drought | -1.09338 | 14.0273 | 0.293 |
| Heather stem | Control | Drought | 0.216265 | 17.0684 | 0.831 |
| **02/06/2025** | | | | | |
| Heather canopy | Control | Drought | -2.16558 | 16.64626 | **0.0452** |
| Heather stem | Control | Drought | -2.81699 | 17.59139 | **0.0116** |
| **29/06/2025** | | | | | |
| Heather canopy | Control | Drought | -0.88047 | 9.205634 | 0.401 |
| Heather stem | Control | Drought | -1.28156 | 9.624353 | 0.23 |
| **12/07/2025** | | | | | |
| Heather canopy | Control | Drought | 0..371243 | 11.94056 | 0.717 |
| Heather stem | Control | Drought | -0.17273 | 10.40807 | 0.866 |
| **28/07/2025** | | | | | |
| Heather canopy | Control | Drought | -0.44552 | 12.27111 | 0.664 |
| Heather stem | Control | Drought | -1.19152 | 14.17317 | 0.253 |
| **25/08/2025** | | | | | |
| Heather canopy | Control | Drought | -0.52212 | 9.406486 | 0.614 |
| Heather stem | Control | Drought | -0.19995 | 18.14885 | 0.844 |
| **29/09/2025** | | | | | |
| Heather canopy | Control | Drought | -0.6888 | 18.97484 | 0.499 |
| Heather stem | Control | Drought | -0.99682 | 11.318 | 0.34 |

Table S9: t-tests comparing the maximum temperature of decomposition (Tmax) of each fuel in control (ghost + control) and drought plots per sample date. Significant p-values are shown in bold.

| Fuel | group1 | group2 | statistic | df | P value |
| --- | --- | --- | --- | --- | --- |
| **11/04/2024** | | | | | |
| Heather canopy | Control | Drought | -1.3698 | 10.92445 | 0.198 |
| Heather stem | Control | Drought | -0.74141 | 18.9986 | 0.468 |
| **13/06/2024** | | | | | |
| Heather canopy | Control | Drought | -0.36519 | 10.29077 | 0.722 |
| Heather stem | Control | Drought | -0.62428 | 10.89132 | 0.545 |
| **12/08/2024** | | | | | |
| Heather canopy | Control | Drought | 0.18436 | 9.290477 | 0.858 |
| Heather stem | Control | Drought | 1.290171 | 7.543477 | 0.235 |
| **09/09/2024** | | | | | |
| Heather canopy | Control | Drought | -0.3366 | 13.54314 | 0.742 |
| Heather stem | Control | Drought | -0.51307 | 16.34346 | 0.615 |
| **29/04/2025** | | | | | |
| Heather canopy | Control | Drought | -0.70787 | 11.58009 | 0.493 |
| Heather stem | Control | Drought | 0.819374 | 8.726728 | 0.434 |
| **02/06/2025** | | | | | |
| Heather canopy | Control | Drought | -1.46414 | 18.95294 | 0.16 |
| Heather stem | Control | Drought | -1.37888 | 7.981493 | 0.205 |
| **29/06/2025** | | | | | |
| Heather canopy | Control | Drought | -2.76462 | 18.37995 | **0.0126** |
| Heather stem | Control | Drought | 0.694379 | 14.04453 | 0.499 |
| **12/07/2025** | | | | | |
| Heather canopy | Control | Drought | -1.25946 | 9.860276 | 0.237 |
| Heather stem | Control | Drought | -0.42035 | 8.765147 | 0.684 |
| **28/07/2025** | | | | | |
| Heather canopy | Control | Drought | -0.05645 | 9.489731 | 0.956 |
| Heather stem | Control | Drought | -0.38912 | 10.9306 | 0.705 |
| **25/08/2025** | | | | | |
| Heather canopy | Control | Drought | -1.13204 | 17.46405 | 0.273 |
| Heather stem | Control | Drought | -1.97035 | 17.41834 | 0.0649 |
| **29/09/2025** | | | | | |
| Heather canopy | Control | Drought | 0.572634 | 9.513613 | 0.58 |
| Heather stem | Control | Drought | 0.958628 | 11.98836 | 0.357 |

Table S10: t-test results comparing FMC of heather canopy, heather stem and the organic layer during a ‘normal’ baseline July, a heatwave and a drought. Bold p-values are significant.

| group1 | group2 | statistic | df | P value |
| --- | --- | --- | --- | --- |
| *Heather canopy* | | | | |
| Heatwave | Drought | 2.557382 | 6.50572 | **0.04** |
| Heatwave | Baseline | -3.64327 | 10.6727 | **0.004** |
| Drought | Baseline | -9.76262 | 7.075809 | **<0.001** |
| *Heather stem* | | | | |
| Heatwave | Drought | 5.784219 | 12.95702 | **<0.001** |
| Heatwave | Baseline | -3.91407 | 9.177113 | **0.003** |
| Drought | Baseline | -7.69741 | 7.802191 | **<0.001** |
| *Organic layer* | | | | |
| Heatwave | Drought | 2.085517 | 9.695504 | 0.064 |
| Heatwave | Baseline | -4.11 | 24.6953 | **<0.001** |
| Drought | Baseline | -6.29641 | 16.5418 | **<0.001** |

*Micrometeorological effects of drought and control shelters*

To determine whether the plastic strips of the drought shelters affected the microclimate of the plots via greenhouse-style warming, and whether there were any edge-effects in the micrometeorological conditions of the drought and control shelters, we carried out linear models using a number of measurements from dataloggers in each plot: soil moisture and three temperature measures from TMS-4 dataloggers (−6, +2 and +15 cm relative to soil surface), and air temperature and relative humidity measures from HOBO dataloggers that were placed in the mid-canopy of *Calluna* plants in each plot. We calculated the mean temperature across the entire experimental timeframe (roughly April to September) for each of these six logger measurements and for each year (2024 and 2025). We ran a linear model for each of the six measurements for each year comparing the mean value with the treatment type (ghost, control or drought) and the position of the logger (edge or middle).

There was an effect of drought shelters on air temperature, where temperatures around the Calluna canopy were on average 0.44 and 0.42 °C warmer in 2024 and 2025, respectively (Table S11). The middle of the control and drought plots were cooler by 0.51-0.54 °C than the edge of the plots in 2025, likely due to the shading effect of *Calluna* canopy within the middle of the plots. Given the lack of effect of the experimental drought on FMC observed, we are reasonably confident that the slight warming effect of the drought shelters did not affect the experiment.

Table S11: Linear models comparing the temperature , soil moisture and relative humidity of ghost, control and drought plots. For TMS loggers, middle and edge effects of plots were also modelled. T1 sensor = 6 cm below ground, T2 sensor = 2 cm above ground, T3 sensor = 15 cm above ground. HOBO loggers were placed in heather canopy. Significant p values are in bold.

| Logger | Term | Estimate | Std.error | Statistic | p-value |
| --- | --- | --- | --- | --- | --- |
| **TMS logger 2024** | | | | | |
| T1 | Intercept (ghost, edge) | 13.15 | 0.11 | 118.91 | **0.000** |
| T1 | Control | -0.28 | 0.10 | -2.67 | **0.012** |
| T1 | Drought | -0.13 | 0.10 | -1.26 | 0.216 |
| T1 | Middle | -0.14 | 0.08 | -1.82 | 0.080 |
|  | | | | | |
| T2 | Intercept (ghost, edge) | 13.23 | 0.14 | 92.96 | **0.000** |
| T2 | Control | -0.23 | 0.13 | -1.71 | 0.099 |
| T2 | Drought | 0.02 | 0.13 | 0.12 | 0.908 |
| T2 | Middle | -0.17 | 0.10 | -1.64 | 0.111 |
|  | | | | | |
| T3 | Intercept (ghost, edge) | 6.15 | 9.06 | 0.68 | 0.503 |
| T3 | Control | 3.27 | 8.56 | 0.38 | 0.705 |
| T3 | Drought | -3.14 | 8.36 | -0.38 | 0.710 |
| T3 | Middle | 7.21 | 6.52 | 1.10 | 0.278 |
|  | | | | | |
| Soil moisture | Intercept (ghost, edge) | 1712.19 | 199.12 | 8.60 | **0.000** |
| Soil moisture | Control | 17.82 | 188.06 | 0.09 | 0.925 |
| Soil moisture | Drought | -300.50 | 183.78 | -1.64 | 0.113 |
| Soil moisture | Middle | -19.59 | 143.38 | -0.14 | 0.892 |
| **HOBO logger 2025** | | | | | |
| Temperature | Intercept (ghost) | 13.66 | 0.08 | 179.16 | **0.000** |
| Temperature | Control | -0.32 | 0.12 | -2.67 | **0.017** |
| Temperature | Drought | 0.44 | 0.11 | 4.07 | **0.001** |
|  | | | | | |
| Rel. humidity | Intercept (ghost) | 85.70 | 0.91 | 94.65 | **0.000** |
| Rel. humidity | Control | 0.88 | 1.40 | 0.62 | 0.541 |
| Rel. humidity | Drought | -1.86 | 1.28 | -1.46 | 0.165 |
| **TMS logger 2025** | | | | | |
| T1 | Intercept (ghost, edge) | 13.93 | 0.21 | 66.98 | **0.000** |
| T1 | Control | -0.21 | 0.19 | -1.07 | 0.295 |
| T1 | Drought | -0.09 | 0.19 | -0.46 | 0.649 |
| T1 | Middle | -0.51 | 0.15 | -3.48 | **0.001** |
|  | | | | | |
| T2 | Intercept (ghost, edge) | 15.55 | 0.25 | 61.51 | **0.000** |
| T2 | Control | -0.24 | 0.24 | -1.03 | 0.310 |
| T2 | Drought | 0.00 | 0.24 | 0.01 | 0.992 |
| T2 | Middle | -0.54 | 0.18 | -3.03 | **0.005** |
|  | | | | | |
| T3 | Intercept (ghost, edge) | 7.48 | 10.49 | 0.71 | 0.481 |
| T3 | Control | 3.77 | 9.81 | 0.38 | 0.704 |
| T3 | Drought | -4.23 | 9.81 | -0.43 | 0.669 |
| T3 | Middle | 7.94 | 7.42 | 1.07 | 0.293 |
|  | | | | | |
| Soil moisture | Intercept (ghost, edge) | 1086.01 | 128.42 | 8.46 | **0.000** |
| Soil moisture | Control | 8.64 | 120.13 | 0.07 | 0.943 |
| Soil moisture | Drought | -182.17 | 120.13 | -1.52 | 0.140 |
| Soil moisture | Middle | -9.42 | 90.81 | -0.10 | 0.918 |
| **HOBO logger 2025** | | | | | |
| Temperature | Intercept (ghost) | 16.33 | 0.13 | 123.53 | **0.000** |
| Temperature | Control | 0.00 | 0.18 | -0.02 | 0.984 |
| Temperature | Drought | 0.42 | 0.18 | 2.32 | **0.033** |
|  | | | | | |
| Rel. humidity | Intercept (ghost) | 77.27 | 0.71 | 108.87 | **0.000** |
| Rel. humidity | Control | -1.80 | 0.97 | -1.86 | 0.080 |
| Rel. humidity | Drought | -1.90 | 0.97 | -1.97 | 0.066 |


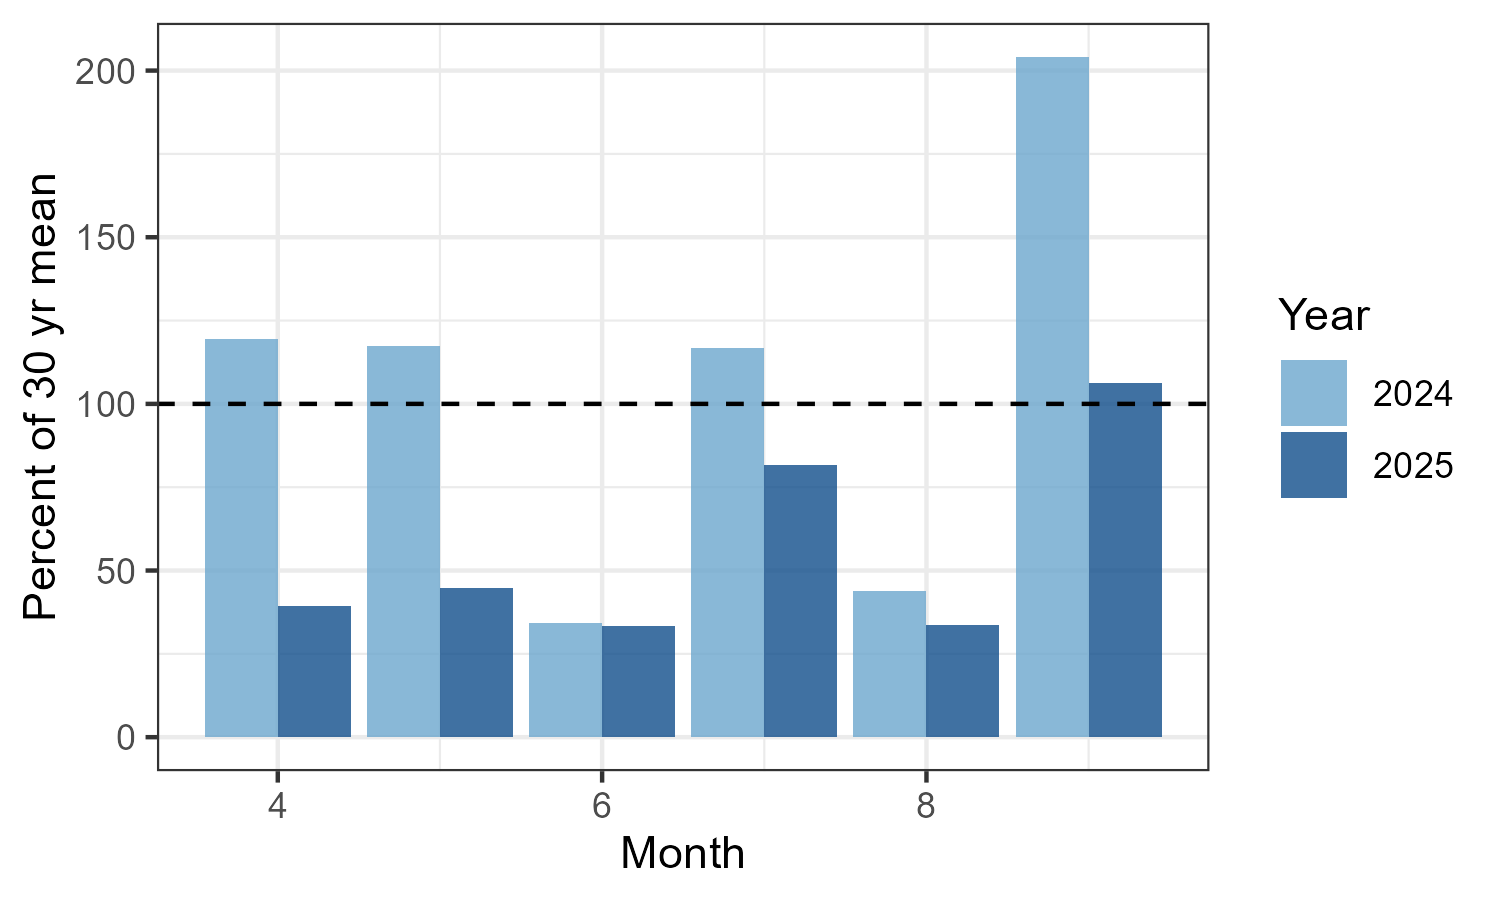


Figure S1: Average total mm of rainfall/month as a percentage of the 30-year average (black dashed line represents the average) in 2024 & 2025. Weather data was collected from Winterbourne weather station.


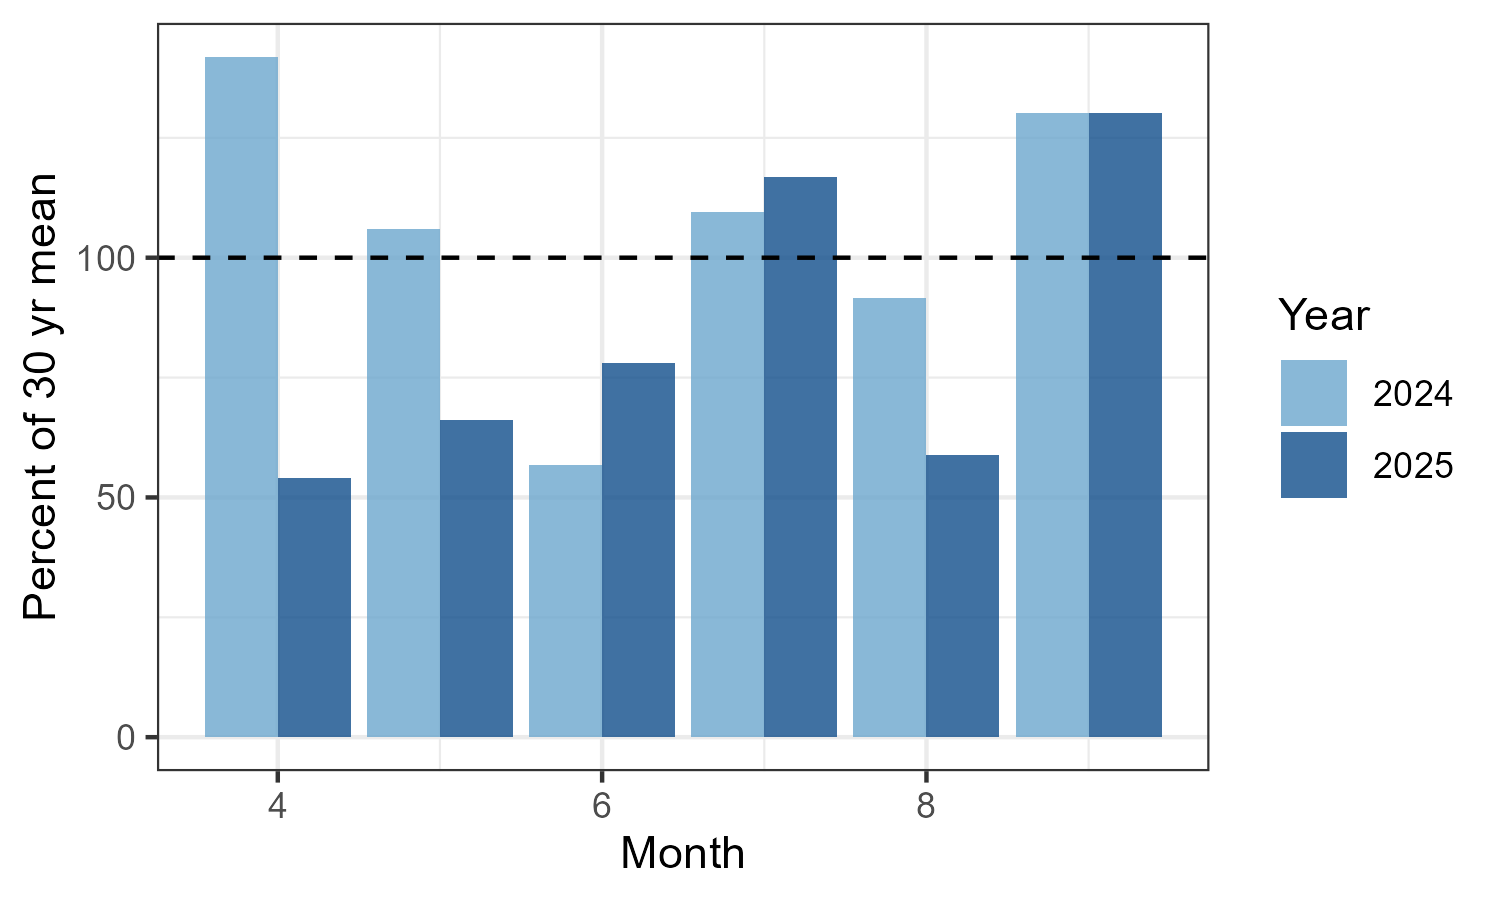


Figure S2: Average number of days/month where rainfall exceeds 0.2 mm as a percentage of the 30-year average (black dashed line represents the average) in 2024 & 2025. Weather data was collected from Winterbourne weather station.


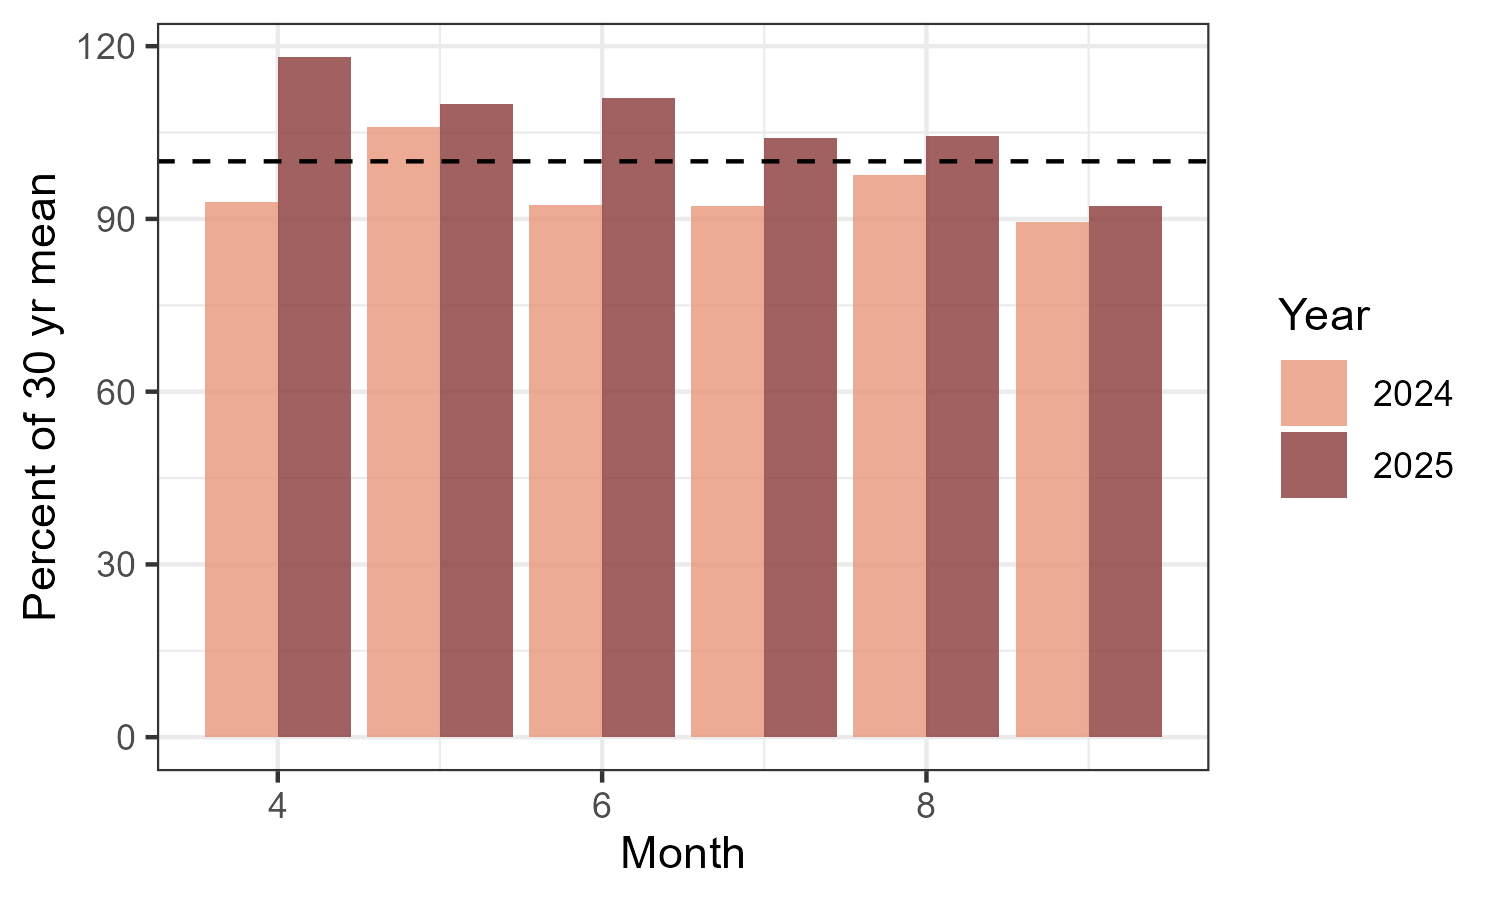
Figure S3: Average mean monthly temperature (deg C) as a percentage of 30-year average monthly temperature (black dashed line represents the average) in 2024 & 2025. Weather data was collected from Winterbourne weather station.


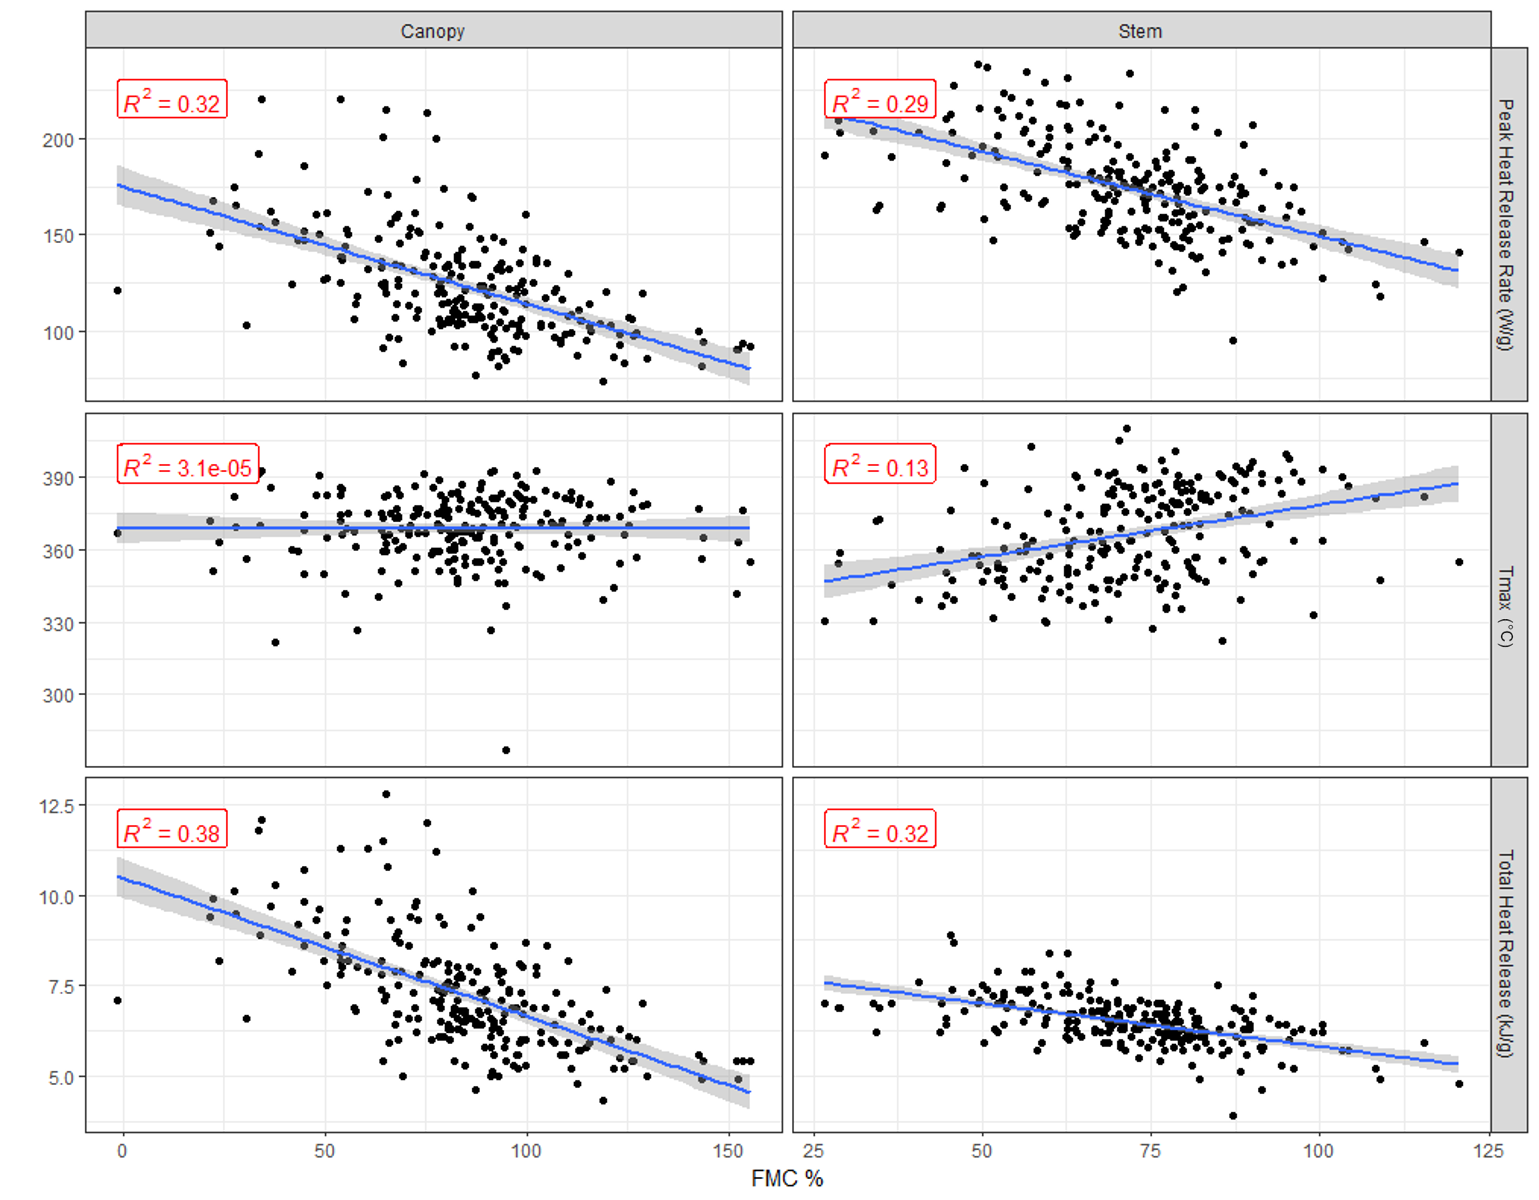


Figure S4: Relationship between fuel moisture content (FMC %) and flammability metrics for *Calluna* canopy and stem material.
